# Supplementary material for: Effects of home‐based chronic wound care training for patients and caregivers: A systematic review
Source: PubMed Central journal article supplement — Int Wound J. 2023 Jun 5;20(9):3802–20. doi: 10.1111/iwj.14219 (PMC10588341; doi:10.1111/iwj.14219), 2023-06-05
Supplement: IWJ-20-3802-s001.pdf [file IWJ-20-3802-s001.pdf]

### **Supplementary file 1: Pubmed (MEDLINE) Search Strategy**

1. "wound healing"[MeSH Terms] OR "pressure ulcer"[MeSH Terms] OR "leg ulcer"[MeSH Terms] OR "diabetic foot"[MeSH Terms] OR "skin ulcer"[MeSH Terms] OR "surgical wound"[MeSH Terms]
  2. "chronic wound\*" [Title/Abstract] OR "chronic ulcer\*" [Title/Abstract] OR "non-healing wound\*" [Title/Abstract]
  3. "malignant wound\*" [Title/Abstract] OR "fungating wound\*" [Title/Abstract] OR "tumor wound\*" [Title/Abstract]
  4. 1 or 2 not 3:184757
  5. "models, educational"[MeSH Terms] OR "patient education as topic"[MeSH Terms] OR "counseling"[MeSH Terms] OR "self care"[MeSH Terms] OR "self management"[MeSH Terms] OR "social support "[MeSH Terms]
  6. "patient teaching" [Title/Abstract] OR "patient training" [Title/Abstract] OR "patient guidance" [Title/Abstract] OR "patient support" [Title/Abstract] OR "patient information" [Title/Abstract] OR "patient empowerment" [Title/Abstract]
  7. "caregiver teaching" [Title/Abstract] OR "caregiver training" [Title/Abstract] OR "caregiver guidance" [Title/Abstract] OR "caregiver support" [Title/Abstract] OR "caregiver information" [Title/Abstract] OR "caregiver empowerment" [Title/Abstract]
  8. "family teaching" [Title/Abstract] OR "family training" [Title/Abstract] OR "family guidance" [Title/Abstract] OR "family support" [Title/Abstract] OR "family information" [Title/Abstract] OR "family empowerment" [Title/Abstract]
  9. 5 or 6 or 7 or 8: 282016
  10. 4 and 9: 1674
  11. Filters applied: Clinical Trial, Controlled Clinical Trial, Randomized Controlled Trial, Humans, Chinese, English, Adult: 19+ years
- Result: 71

**Supplementary file 2: RISK OF Bias assessment for RCTs**

| <b>Subrata et al (2020)</b>                             |                  |                                                                                                                             |
|---------------------------------------------------------|------------------|-----------------------------------------------------------------------------------------------------------------------------|
| <b>Criteria</b>                                         | <b>Judgement</b> | <b>Comments to support judgement</b>                                                                                        |
| Sequence generation                                     | Low              | Eligible respondents were randomly assigned using a computer-generated randomization schedule                               |
| Allocation concealment                                  | Low              | This process of group allocation was protected by the researcher only                                                       |
| Blinding of participants and personnel for all outcomes | High             | Participants were not blinded for the usual care did not include skill training and motivational interviewing               |
| Blinding of outcome assessors                           | Unclear          | Not stated who collected the data and whether the collector was blinded                                                     |
| Incomplete outcome data for all outcomes                | Low              | Data for all outcomes were reported in tables                                                                               |
| Selective outcome reporting                             | Low              | Outcomes on study protocol were all reported                                                                                |
| Other sources of bias                                   | Unclear          | It was not clear if the analysis adequately accounted for all confounding factors                                           |
| <b>Study: Žulec et al (2022)</b>                        |                  |                                                                                                                             |
| Sequence generation                                     | High             | Eligible respondents were randomly assigned depending on the order of entering the room                                     |
| Allocation concealment                                  | Unclear          | It was not clearly stated how this was ensured                                                                              |
| Blinding of participants and personnel for all outcomes | High             | Participants could not be blinded to the intervention                                                                       |
| Blinding of outcome assessors                           | Unclear          | It was not stated who did the outcome data collection and whether the person was blinded                                    |
| Incomplete outcome data for all outcomes                | Low              | Data for all outcomes were reported in tables                                                                               |
| Selective outcome reporting                             | Unclear          | Protocol for the study not published or registered to be able assess this                                                   |
| Other sources of bias                                   | Unclear          | Protocol not available to able to determine if all outcomes were reported and confounding factors accounted for in analysis |
| <b>Study: Satehi et al (2021)</b>                       |                  |                                                                                                                             |
| Sequence generation                                     | Unclear          | Details of how the randomization was done not described                                                                     |
| Allocation concealment                                  | Unclear          | It was not clearly stated how this was ensured                                                                              |
| Blinding of participants and personnel for all outcomes | Low              | Participants were not informed the grouping results                                                                         |
| Blinding of outcome assessors                           | Unclear          | It was not stated who did the outcome data collection and whether the person was blinded                                    |
| Incomplete outcome data for all outcomes                | Low              | Data for all outcomes were reported in tables                                                                               |
| Selective outcome reporting                             | Low              | Outcomes on study protocol were all reported                                                                                |

|                                                         |         |                                                                                                                                     |
|---------------------------------------------------------|---------|-------------------------------------------------------------------------------------------------------------------------------------|
| Other sources of bias                                   | Unclear | It was not clear if the analysis adequately accounted for all confounding factors                                                   |
| <b>Study: Chen H et al (2020)</b>                       |         |                                                                                                                                     |
| Sequence generation                                     | Low     | Random allocation software was used to randomised participants                                                                      |
| Allocation concealment                                  | Low     | Randomization was done with a software and the results were kept in Shanghai Qeejen Bio-tech Company                                |
| Blinding of participants and personnel for all outcomes | High    | Participants could not be blinded to the intervention                                                                               |
| Blinding of outcome assessors                           | Unclear | The physician and nurses did the data collection, but it was not stated if they were blinded or not                                 |
| Incomplete outcome data for all outcomes                | Low     | Data for all outcomes were reported in tables                                                                                       |
| Selective outcome reporting                             | Unclear | Protocol for the study not published or registered to be able assess this                                                           |
| Other sources of bias                                   | Unclear | Protocol not available to able to determine if all outcomes were reported and confounding factors accounted for in analysis         |
| <b>Study: Clarke M M et al(2005)</b>                    |         |                                                                                                                                     |
| Sequence generation                                     | Low     | Eligible respondents were randomly assigned using a computer-generated randomization schedule                                       |
| Allocation concealment                                  | Low     | The randomization list was generated by computer, and the results were entered sequentially into sealed, opaque, numbered envelopes |
| Blinding of participants and personnel for all outcomes | High    | Participants could not be blinded to the intervention                                                                               |
| Blinding of outcome assessors                           | Low     | Patients were asked not to inform the interviewing doctor which group they had been randomised to                                   |
| Incomplete outcome data for all outcomes                | Low     | Data for all outcomes were reported in tables                                                                                       |
| Selective outcome reporting                             | Unclear | Protocol for the study not published or registered to be able assess this                                                           |
| Other sources of bias                                   | Unclear | Protocol not available to able to determine if all outcomes were reported and confounding factors accounted for in analysis         |
| <b>Study: Heinen M et al(2012)</b>                      |         |                                                                                                                                     |
| Sequence generation                                     | Unclear | Details of how the randomization was done not described                                                                             |
| Allocation concealment                                  | Unclear | It was not clearly stated how this was ensured                                                                                      |
| Blinding of participants and personnel for all outcomes | High    | Participants could not be blinded to the intervention                                                                               |
| Blinding of outcome assessors                           | Low     | Outcome assessors had no knowledge of group allocation of participants                                                              |
| Incomplete outcome data for all outcomes                | Low     | Data for all outcomes were reported in tables                                                                                       |

|                                                         |         |                                                                                                                                                    |
|---------------------------------------------------------|---------|----------------------------------------------------------------------------------------------------------------------------------------------------|
| Selective outcome reporting                             | Unclear | Protocol for the study not published or registered to be able assess this                                                                          |
| Other sources of bias                                   | Unclear | Protocol not available to able to determine if all outcomes were reported and confounding factors accounted for in analysis                        |
| <b>Study: Heng ML et al(2020)</b>                       |         |                                                                                                                                                    |
| Sequence generation                                     | Low     | Eligible respondents were randomly assigned using an online randomiser                                                                             |
| Allocation concealment                                  | Low     | The randomization results were entered sequentially into sealed envelopes.                                                                         |
| Blinding of participants and personnel for all outcomes | Low     | Participants were not informed the grouping results                                                                                                |
| Blinding of outcome assessors                           | Unclear | It was not stated who did the outcome data collection and whether the person was blinded                                                           |
| Incomplete outcome data for all outcomes                | Low     | Data for all outcomes were reported in tables                                                                                                      |
| Selective outcome reporting                             | Low     | Outcomes as indicated in trial register were all reported                                                                                          |
| Other sources of bias                                   | Unclear | It was not clear if the analysis adequately accounted for all confounding factors                                                                  |
| <b>Study: Domingues EAR et al(2018)</b>                 |         |                                                                                                                                                    |
| Sequence generation                                     | Low     | A randomised sequence was generated by the website randomization.com, with 120 participants in numerical sequence concealed from the investigators |
| Allocation concealment                                  | Low     | The randomization list was generated by computer, and the results were entered sequentially into sealed, opaque, numbered envelopes                |
| Blinding of participants and personnel for all outcomes | High    | Participants could not be blinded to the intervention                                                                                              |
| Blinding of outcome assessors                           | Low     | Outcome assessors had no knowledge of group allocation of participants                                                                             |
| Incomplete outcome data for all outcomes                | Low     | Data for all outcomes were reported in tables                                                                                                      |
| Selective outcome reporting                             | Low     | Outcomes as indicated in trial register were all reported                                                                                          |
| Other sources of bias                                   | High    | Regarding wound area on baseline, the mean difference between two groups was 10.57, P=0.0051                                                       |
| <b>Study: Sonal SM et al(2019)</b>                      |         |                                                                                                                                                    |
| Sequence generation                                     | Low     | A randomised sequence was generated by the envelop method                                                                                          |
| Allocation concealment                                  | Unclear | It was not clearly stated how this was ensured                                                                                                     |
| Blinding of participants and personnel for all outcomes | High    | Participants could not be blinded to the intervention                                                                                              |
| Blinding of outcome assessors                           | Unclear | It was not stated who did the outcome data collection and whether the person was blinded                                                           |
| Incomplete outcome data for all outcomes                | Low     | Data for all outcomes were reported in tables                                                                                                      |

|                                                         |         |                                                                                          |
|---------------------------------------------------------|---------|------------------------------------------------------------------------------------------|
| Selective outcome reporting                             | Unclear | Protocol for the study not published or registered to be able assess this                |
| Other sources of bias                                   | Unclear | It was not clear if the analysis adequately accounted for all confounding factors        |
| <b>Study: Zhou DM et al(2014)</b>                       |         |                                                                                          |
| Sequence generation                                     | High    | A randomised sequence was generated by the order of inclusion in this period             |
| Allocation concealment                                  | Unclear | It was not clearly stated how this was ensured                                           |
| Blinding of participants and personnel for all outcomes | High    | Participants could not be blinded to the intervention                                    |
| Blinding of outcome assessors                           | Unclear | It was not stated who did the outcome data collection and whether the person was blinded |
| Incomplete outcome data for all outcomes                | Low     | Data for all outcomes were reported in tables                                            |
| Selective outcome reporting                             | Unclear | Protocol for the study not published or registered to be able assess this                |
| Other sources of bias                                   | Unclear | It was not clear if the analysis adequately accounted for all confounding factors        |

**Supplementary file 3: Risk of Bias Assessment for non-randomized studies**

|                          | Bias due to confounding | Bias in selection of participants into the study | Bias in classification of interventions | Bias due to deviations from intended interventions | Bias due to missing data | Bias in measurement of outcome | Bias in selection of the reported result | Overall  |
|--------------------------|-------------------------|--------------------------------------------------|-----------------------------------------|----------------------------------------------------|--------------------------|--------------------------------|------------------------------------------|----------|
| Appil et al 2020         | Moderate                | Low                                              | Low                                     | Moderate                                           | Low                      | Moderate                       | No information                           | Moderate |
| Damhudi D 2021           | Moderate                | Low                                              | Low                                     | Moderate                                           | No information           | Moderate                       | No information                           | Moderate |
| Hemmati Maslampak M 2018 | Serious                 | Low                                              | Low                                     | Moderate                                           | Moderate                 | Moderate                       | No information                           | Serious  |
| Protz K 2019             | Moderate                | Moderate                                         | Low                                     | Low                                                | Low                      | Moderate                       | Low                                      | Moderate |
| Cheng H 2019             | Moderate                | Low                                              | Low                                     | Moderate                                           | No information           | Moderate                       | No information                           | Moderate |
| Liu X 2016               | Moderate                | Low                                              | Low                                     | Moderate                                           | No information           | Moderate                       | No information                           | Moderate |

**Supplementary file 4: Description of interventions**

| Study ID<br>(author, year<br>& country) | Theme of<br>intervention              | Description of the intervention(s) or exposure                                                                                                                                                                                                                                                                                                                                                                                                                                                                                                   | Intervention type              | Intervention provider and<br>strategies                                                                                      |
|-----------------------------------------|---------------------------------------|--------------------------------------------------------------------------------------------------------------------------------------------------------------------------------------------------------------------------------------------------------------------------------------------------------------------------------------------------------------------------------------------------------------------------------------------------------------------------------------------------------------------------------------------------|--------------------------------|------------------------------------------------------------------------------------------------------------------------------|
| Appil R,<br>2020,<br>Indonesia          | Family<br>Empowerment                 | In the first week, the education was provided using a picture booklet containing 'benefits of family empowerment and basic knowledge about DM.' In the second week, the education focused on diet/meal planning, medication, blood sugar control, physical exercise, and stress management.<br><br>This was done through a 45-minute lecture and practice exercises, including question and answer sessions. In the third week, education about the treatment of DFU was provided. Last, in the fourth week, an evaluation meeting was conducted | Education-behavioural          | Wound care nurses/<br>To verify the activities completed during the intervention, a logbook was provided to each participant |
| Chen H,<br>2020, china                  | intensive patients' education program | intensive patients' education program: which included five items: education to the patients, education to the family members of patients, supervision of patients' harmful habits and diets, psychological care for the patients and establishment of a patient-physician-nurse WeChat group                                                                                                                                                                                                                                                     | Psycho-behavioural-educational | Nurses and physicians                                                                                                        |
| Clarke<br>Moloney<br>M,2005,<br>Ireland | information leaflet                   | received verbal information along with an information leaflet                                                                                                                                                                                                                                                                                                                                                                                                                                                                                    | Educational                    | Attending doctor                                                                                                             |
| Damhudi D,<br>2021,                     | diabetes self-management              | The DSMES has been adapted to cover 8 core components. The subject matter covered DSME clinical definition, types                                                                                                                                                                                                                                                                                                                                                                                                                                | Psycho-behavioural-educational | Nurse educators; The sessions were taught in a                                                                               |

|                                 |                                           |                                                                                                                                                                                                                                                                                                                         |                       |                                                                                                                                                                                                                                                        |
|---------------------------------|-------------------------------------------|-------------------------------------------------------------------------------------------------------------------------------------------------------------------------------------------------------------------------------------------------------------------------------------------------------------------------|-----------------------|--------------------------------------------------------------------------------------------------------------------------------------------------------------------------------------------------------------------------------------------------------|
| Indonesia                       | education and support (DSMES) programs    | of diabetes, fundamental physiology, objectives for blood glucose control (glycemia, blood pressure, and cholesterol targets), emotional and stress management, management of healthy food, activities/training, pharmacology, blood glucose A1C self-monitoring, signs/symptoms/treatment, hyperglycemia, and sickness |                       | collaborative setting by the entire research team, which included both certified diabetes educators who had been received training and had previous expertise in both methods of teaching                                                              |
| Heinen M, 2012, The Netherlands | The Lively Legs self-management programme | The intervention group received additionally to usual care, lifestyle counselling                                                                                                                                                                                                                                       | Education-behavioural | All nurse health counselors were trained and supervised by the same group of trainers consisting of a nurse scientist, a clinical psychologist who is also a cognitive-behaviour therapist and a psychologist specialized in motivational interviewing |
| Hemmati Maslampak M, 2018, Iran | Orem's self-care program                  | The content of these sessions consisted of self-care activities related to diabetic foot care. Then, each patient in the intervention group received home visits once a week for 3 week                                                                                                                                 | Education-behavioural | Nurse                                                                                                                                                                                                                                                  |
| Heng ML, 2020, Singapore        | collaborative patient education           | (a)collaboration with the patient, (b)respecting that patients are the experts of their own lives and (c)drawing out patients' intrinsic self motivation and know-hows to work towards co-creating next steps in the treatment plan.                                                                                    | Psycho-educational    | With training in essential counselling skills, Solutions focused counselling and motivational Interviewing                                                                                                                                             |



|                                    |                                                                      |                                                                                                                                                                                                                                                                                                                                                                                                                                                                                                                                                                                                                                                                                                         |                       |                                                                                                              |
|------------------------------------|----------------------------------------------------------------------|---------------------------------------------------------------------------------------------------------------------------------------------------------------------------------------------------------------------------------------------------------------------------------------------------------------------------------------------------------------------------------------------------------------------------------------------------------------------------------------------------------------------------------------------------------------------------------------------------------------------------------------------------------------------------------------------------------|-----------------------|--------------------------------------------------------------------------------------------------------------|
|                                    |                                                                      | the podiatrists merely changed the way they approached their communication style and delivered the counselling within the usual treatment duration                                                                                                                                                                                                                                                                                                                                                                                                                                                                                                                                                      |                       | skills enhancement courses, the study team members came together to develop an approach to patient education |
| Domingues EAR, 2018, Brazil        | an orientation programme for the lifestyle and wound-healing process | lifestyle guidelines regarding the physiopathology of a venous ulcer, importance of compression therapy, physical exercises and rest                                                                                                                                                                                                                                                                                                                                                                                                                                                                                                                                                                    | Education-behavioural | lead researcher                                                                                              |
| Protz K, 2019, Germany and Austria | a brochure education                                                 | a brochure about venous disease and compression therapy. The patients were asked to read the brochure carefully at home and bring it back with them to their next appointment                                                                                                                                                                                                                                                                                                                                                                                                                                                                                                                           | Educational           | Medical staff                                                                                                |
| Satehi SB, 2021, Iran              | Teach-Back and Multimedia Teaching                                   | In the teach-back group, the researcher went to patients' rooms before they were discharged and provided training in a single one-on-one, face-to-face session lasting 45 minutes, using simple, understandable language free of medical terminology. At the end of these sessions, the researcher asked patients to retell the material in their own words as they understood it. In the multimedia group, the same content was used but was not provided orally in person. Instead, patients received educational videos via CD,DVD, and mobile device files. The content of these videos included everything that was taught in person in the teach-back group, and, as in that group, the education | Education-behavioural | Researcher                                                                                                   |

|                             |                                             |                                                                                                                                                                                                                                                                                                                                                                                                                                                                                                                                                                                                                                                                                                                                                                                                                                                    |                                |                       |
|-----------------------------|---------------------------------------------|----------------------------------------------------------------------------------------------------------------------------------------------------------------------------------------------------------------------------------------------------------------------------------------------------------------------------------------------------------------------------------------------------------------------------------------------------------------------------------------------------------------------------------------------------------------------------------------------------------------------------------------------------------------------------------------------------------------------------------------------------------------------------------------------------------------------------------------------------|--------------------------------|-----------------------|
|                             |                                             | lasted for 45 minutes                                                                                                                                                                                                                                                                                                                                                                                                                                                                                                                                                                                                                                                                                                                                                                                                                              |                                |                       |
| Sonal Sekhar M, 2019, India | patient-education                           | The patients were educated by the clinical pharmacists about various foot care measures and their importance by using patient information leaflets. They were counseled about the importance of medication compliance, the need for off-loading, wound dressing, the use of properly fitting foot wear and also about annual podiatry reviews                                                                                                                                                                                                                                                                                                                                                                                                                                                                                                      | Psycho-educational             | Clinical pharmacists  |
| Subrata SA, 2020, Indonesia | Self and family management support programs | The programs implemented intensive health education, skill training, and motivational interviewing (MI).                                                                                                                                                                                                                                                                                                                                                                                                                                                                                                                                                                                                                                                                                                                                           | Psycho-behavioural-educational | Unclear               |
| Žulec M, 2022, Croatia      | Educational Intervention on Self-Care       | The participants in the experimental group received the educational brochure and a short presentation of it. The brochure contained an introductory section with an explanation of the causes of VLU and their main characteristics. The central part of the brochure explained wound dressing in a step-by-step manner, with photos of real patients. After that, a section on the types and benefits of compression therapy followed, also with photographs. Special attention was paid to the importance of maintaining regular body and foot hygiene as well as promoting exercise. Descriptions of the the positions of the body at rest and nutrition advice were given. Pictures of leg exercises were shown, and special attention was given to activities for people with limited mobility. The final part included brief tips and tricks | Educational                    | Nurses                |
| Cheng H,                    | family-based                                | Establish a WeChat group including of doctor, nurse and                                                                                                                                                                                                                                                                                                                                                                                                                                                                                                                                                                                                                                                                                                                                                                                            | Education-behavioural          | International Chronic |

|                      |                                             |                                                                                                                                                                                                                                                                                                                                                                                                                                                                                                                                                                                                                                                                                                                                        |                       |                                                                                                  |
|----------------------|---------------------------------------------|----------------------------------------------------------------------------------------------------------------------------------------------------------------------------------------------------------------------------------------------------------------------------------------------------------------------------------------------------------------------------------------------------------------------------------------------------------------------------------------------------------------------------------------------------------------------------------------------------------------------------------------------------------------------------------------------------------------------------------------|-----------------------|--------------------------------------------------------------------------------------------------|
| 2019, China          | telenursing mode                            | patients for the observation group, and send notification information. Wound therapists provide remote intervention guidance to patients and caregivers through the WeChat platform. Wound therapists develop an individualized pressure ulcer home care plan, the main contents of the plan include: the importance of pressure ulcer home care and prevention education; Frequency, time and position guidance of turning behavior ; Pressure-reducing device application guidance; change time of wound dressing, wound exudate recording and the application method of skin protection oil; Skin cleaning and other nursing guidance; Nutrition support and guidance; Measurement method of the size and degree of pressure ulcers |                       | Wound Commission-certified wound therapists                                                      |
| Liu X, 2016, China   | Pressure ulcer care behavioral intervention | For each case of pressure ulcer patients, before the discharge the wound therapist made individualized pressure ulcer home care plan, the plan should fully consider the patient's own condition and the family economic situation, and on the basis of patient caregivers form, and consultation by another wound therapist at the same level, print out a copy to the family primary caregiver at discharge                                                                                                                                                                                                                                                                                                                          | Education-behavioural | Wound care therapist                                                                             |
| Zhou DM, 2014, China | Individualized education programs           | (1)Individual guidance: including pressure ulcer related knowledge guidance and care skills demonstration 2 times. after the end of the guidance provided pressure ulcer prevention and control manual and CD.(2)Family visit: to                                                                                                                                                                                                                                                                                                                                                                                                                                                                                                      | Education-behavioural | Telephone follow-up by investigator and Individual guidance by clinical nursing experts to teach |

|  |  |                                                                                                                                                                                                                                                                                                                                                                                                                                                                                                                                                                                                                                                                                 |  |                        |
|--|--|---------------------------------------------------------------------------------------------------------------------------------------------------------------------------------------------------------------------------------------------------------------------------------------------------------------------------------------------------------------------------------------------------------------------------------------------------------------------------------------------------------------------------------------------------------------------------------------------------------------------------------------------------------------------------------|--|------------------------|
|  |  | <p>understand the implementation of turning over and dressing change for the patients, and to evaluate the actual care behavior of the caregivers. Visit the patients whenever necessary during the intervention period. Find and deal with problems in the care process, and work with caregivers.(3) Telephone follow-up and consultation. Intervention group made a CD, including the performance of pressure ulcer, the re-position method, home dressing and disinfection equipment at home, nutrition support, skin care method. At the same time also compiled the "home pressure ulcer prevention and control manual", including the causes, prevention and FAQ etc</p> |  | <p>and demonstrate</p> |
|--|--|---------------------------------------------------------------------------------------------------------------------------------------------------------------------------------------------------------------------------------------------------------------------------------------------------------------------------------------------------------------------------------------------------------------------------------------------------------------------------------------------------------------------------------------------------------------------------------------------------------------------------------------------------------------------------------|--|------------------------|

**Supplementary file 4: description of interventions(continued)**

| Author           | Name of intervention                  | Intervention type                                                                                                              | Intervention provider                                                                                                  | Teaching methodology                                      | Delivery Strategies                                                                                                                              | Format                                                                            | Number of intervention sessions delivered | Intervention duration (weeks) | Intervention follow-up (weeks) |
|------------------|---------------------------------------|--------------------------------------------------------------------------------------------------------------------------------|------------------------------------------------------------------------------------------------------------------------|-----------------------------------------------------------|--------------------------------------------------------------------------------------------------------------------------------------------------|-----------------------------------------------------------------------------------|-------------------------------------------|-------------------------------|--------------------------------|
|                  |                                       | 1Educational<br>2behavioural<br>3Psychological<br>4psycho-behavioural<br>5psycho-educational<br>6education-behavioural<br>7all | 1nurse<br>2attending doctor/physician<br>3researcher<br>4pharmacists<br>5medical staff/nurse and doctor<br>6don't know | 1Didactic only<br>2Interactive only<br>3Mixed (used both) | 1Web-based/online only<br>2Written documents only<br>3Video only<br>4Face-to-face only<br>5Phone calls only<br>6Mixed, at least two of the above | 1One-to-one sessions only<br>2Group sessions only<br>3Mixed one-to-one and groups |                                           |                               |                                |
| Appil R          | Family Empowerment                    | 6                                                                                                                              | 1                                                                                                                      | 3                                                         | 6                                                                                                                                                | 3                                                                                 | 4                                         | 4                             | 12                             |
| Chen H           | intensive patients' education program | 7                                                                                                                              | 5                                                                                                                      | 3                                                         | 6                                                                                                                                                | Don't know                                                                        | 12                                        | 12                            | 12                             |
| Clarke Moloney M | information leaflet                   | 1                                                                                                                              | 2                                                                                                                      | 1                                                         | 6                                                                                                                                                | 1                                                                                 | 1                                         | Don't know                    | 6                              |

|                     |                                                                 |   |   |   |            |            |            |            |            |
|---------------------|-----------------------------------------------------------------|---|---|---|------------|------------|------------|------------|------------|
| Damhudi D           | diabetes self-management education and support (DSMES) programs | 7 | 1 | 3 | 6          | 3          | 8          | 8          | 12         |
| Heinen M            | The Lively Legs self-management programme                       | 6 | 1 | 3 | 6          | 1          | 6          | 24         | 72         |
| Hemmati Maslampak M | Orem's self-care program                                        | 6 | 1 | 3 | 4          | 3          | 5          | 3          | 12         |
| Heng ML             | collaborative patient education                                 | 5 | 3 | 2 | 4          | 1          | Don't know | 30min      | 12         |
| Domingues EAR       | an orientation programme                                        | 6 | 3 | 2 | 6          | 1          | 4          | 12         | 12         |
| Protz K             | a brochure education                                            | 1 | 5 | 1 | 2          | 1          | 1          | Don't know | Don't know |
| Satehi SB           | Teach-Back Teaching                                             | 6 | 3 | 2 | 4          | 1          | 1          | 45min      | 2          |
|                     | Multimedia Teaching                                             | 6 | 3 | 1 | 3          | 1          | 1          | 45min      | 2          |
| Sonal Sekhar M      | patient-education                                               | 5 | 4 | 3 | 6          | 1          | 6          | 24         | 24         |
| Subrata SA          | Self and family management                                      | 7 | 6 | 3 | Don't know | Don't know | 24         | 12         | 12         |

|         |                                             |   |   |   |   |   |            |            |    |
|---------|---------------------------------------------|---|---|---|---|---|------------|------------|----|
|         | support programs                            |   |   |   |   |   |            |            |    |
| Žulec M | Educational Intervention on Self-Care       | 1 | 1 | 1 | 2 | 1 | 1          | Don't know | 12 |
| Cheng H | family-based telenursing mode               | 6 | 1 | 3 | 1 | 1 | Don't know | Don't know | 8  |
| Liu X   | Pressure ulcer care behavioral intervention | 6 | 1 | 3 | 6 | 1 | Don't know | Don't know | 8  |
| Zhou DM | Individualized education programs           | 6 | 5 | 3 | 6 | 1 | 7          | 12         | 12 |

**Supplementary file 5: Coded Intervention Types and Delivery Strategies**

| Intervention elements                            | Number of studies |
|--------------------------------------------------|-------------------|
| <b>Types of Interventions identified</b>         |                   |
| Psychological                                    | 0                 |
| Educational                                      | 3                 |
| Behavioural                                      | 0                 |
| Mixed (combination of at least 2 of the above)   | 14                |
| <b>Teaching methodology</b>                      |                   |
| Didactic only                                    | 4                 |
| Interactive only                                 | 3                 |
| Mixed (used both)                                | 10                |
| <b>Delivery Strategies</b>                       |                   |
| Web-based/online only                            | 1                 |
| Written documents only                           | 2                 |
| Video                                            | 1                 |
| Face-to-face only                                | 3                 |
| Phone calls only                                 | 0                 |
| Mixed, at least two of the above                 | 9                 |
| Unclear                                          | 1                 |
| <b>Format</b>                                    |                   |
| One-to-one sessions only                         | 12                |
| Group sessions only                              | 0                 |
| Mixed one-to-one and groups                      | 3                 |
| Unclear                                          | 2                 |
| <b>Number of intervention sessions delivered</b> |                   |
| ≤5 sessions                                      | 8                 |
| 6 – 10                                           | 4                 |
| ≥11                                              | 2                 |
| Unclear                                          | 3                 |
| <b>Duration of intervention</b>                  |                   |
| <1day                                            | 3                 |
| 1day-4weeks                                      | 2                 |
| 5-12 weeks                                       | 5                 |
| ≥13 weeks                                        | 2                 |
| Unclear                                          | 5                 |
| <b>Duration of follow up</b>                     |                   |
| ≤4 weeks                                         | 2                 |
| 5-12 weeks                                       | 12                |
| ≥13 weeks                                        | 2                 |
| Unclear                                          | 1                 |
